# Supplementary material for: CXCR6 is required for antitumor efficacy of intratumoral CD8+ T cell
Source: PubMed Central journal article supplement — J Immunother Cancer. 2021 Aug 30;9(8):e003100. doi: 10.1136/jitc-2021-003100 (PMC8407215; doi:10.1136/jitc-2021-003100), 2021-08-30
Supplement: jitc-2021-003100supp001.pdf [file jitc-2021-003100supp001.pdf]

**SUPPLEMENTARY INFORMATION****CXCR6 Is Required for Anti-tumor Efficacy of Intratumoral CD8<sup>+</sup> T Cell**

Binglin Wang, Yi Wang, Xiaofan Sun, Guoliang Deng, Wei Huang, Xingxin Wu,

Yanhong Gu, Zhigang Tian, Zhimin Fan, Qiang Xu\*, Hongqi Chen\*, Yang Sun\*.

- **Supplementary Figure 1-6**

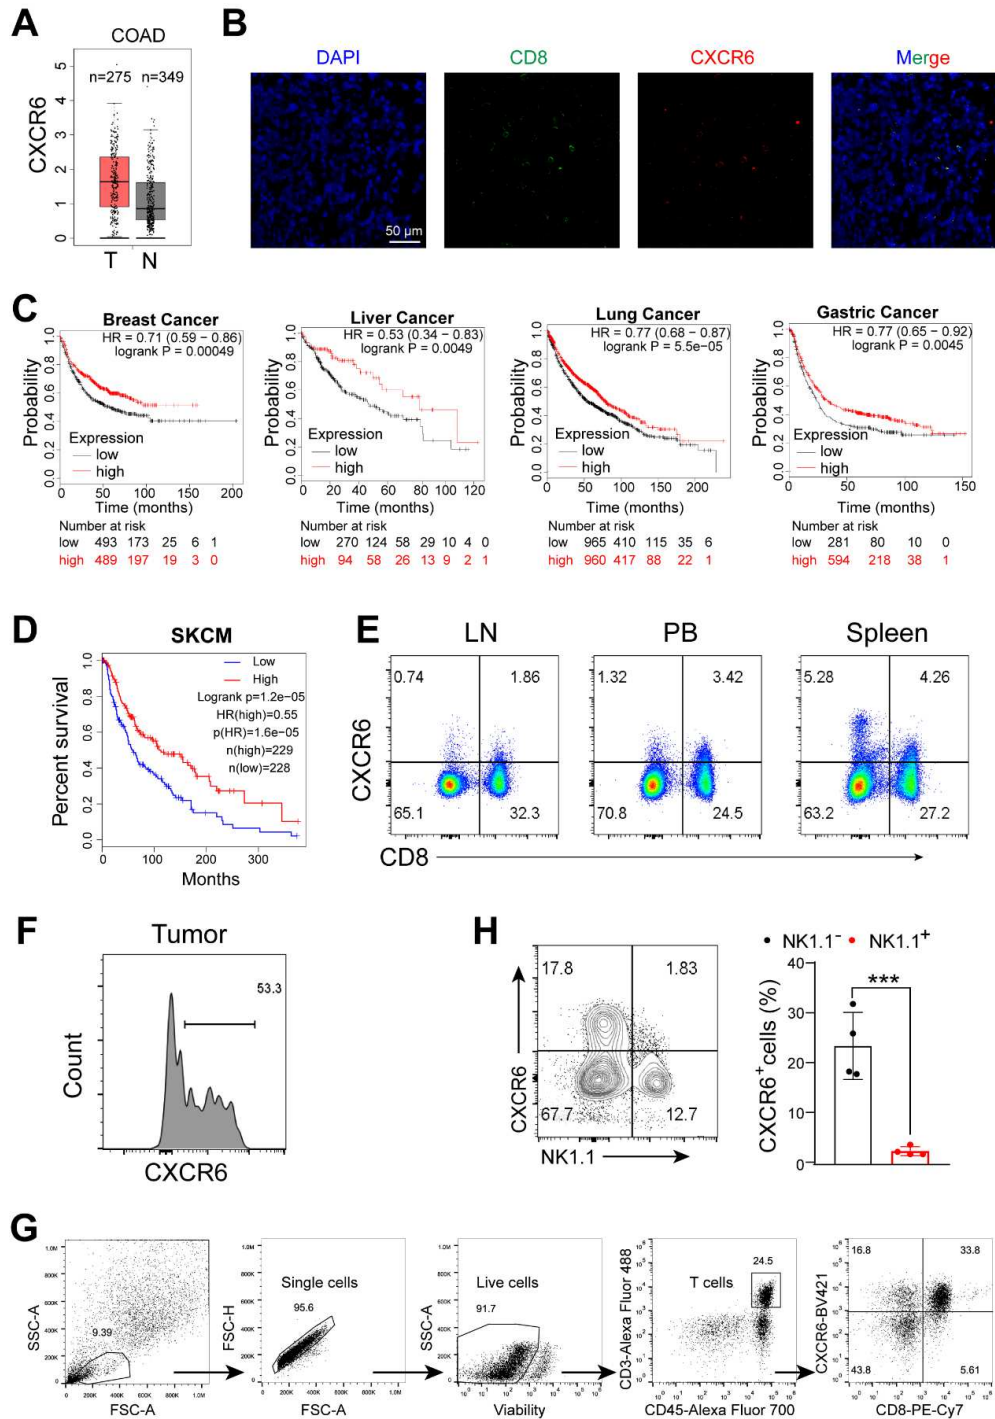

DAPI (blue)/CD8 (green)/CXCR6 (red) and their overlay in tumor tissues from MC38 tumors. **C.** Kaplan-Meier survival curves comparing the high and low expression of CXCR6 in breast, liver, lung and gastric cancer analyzed by Kaplan-Meier Plotter Database (<https://kmplot.com/analysis/>). **D.** Survival curve comparing the high and low expression of CXCR6 in skin cutaneous melanoma (SKCM) analyzed by GEPIA website. **E and F.** Representative plots CXCR6<sup>+</sup>CD8<sup>+</sup> T cells in peripheral blood (PB), lymph node (LN), spleen and tumor from CT26 tumor-bearing mice. **H.** The expression of CXCR6 on NK cells in MC38 tumor tissue. **G.** Gating strategy for determination of CXCR6 expression on tumor-infiltrating CD8<sup>+</sup> T cells. \*\*\* $P < 0.001$ .

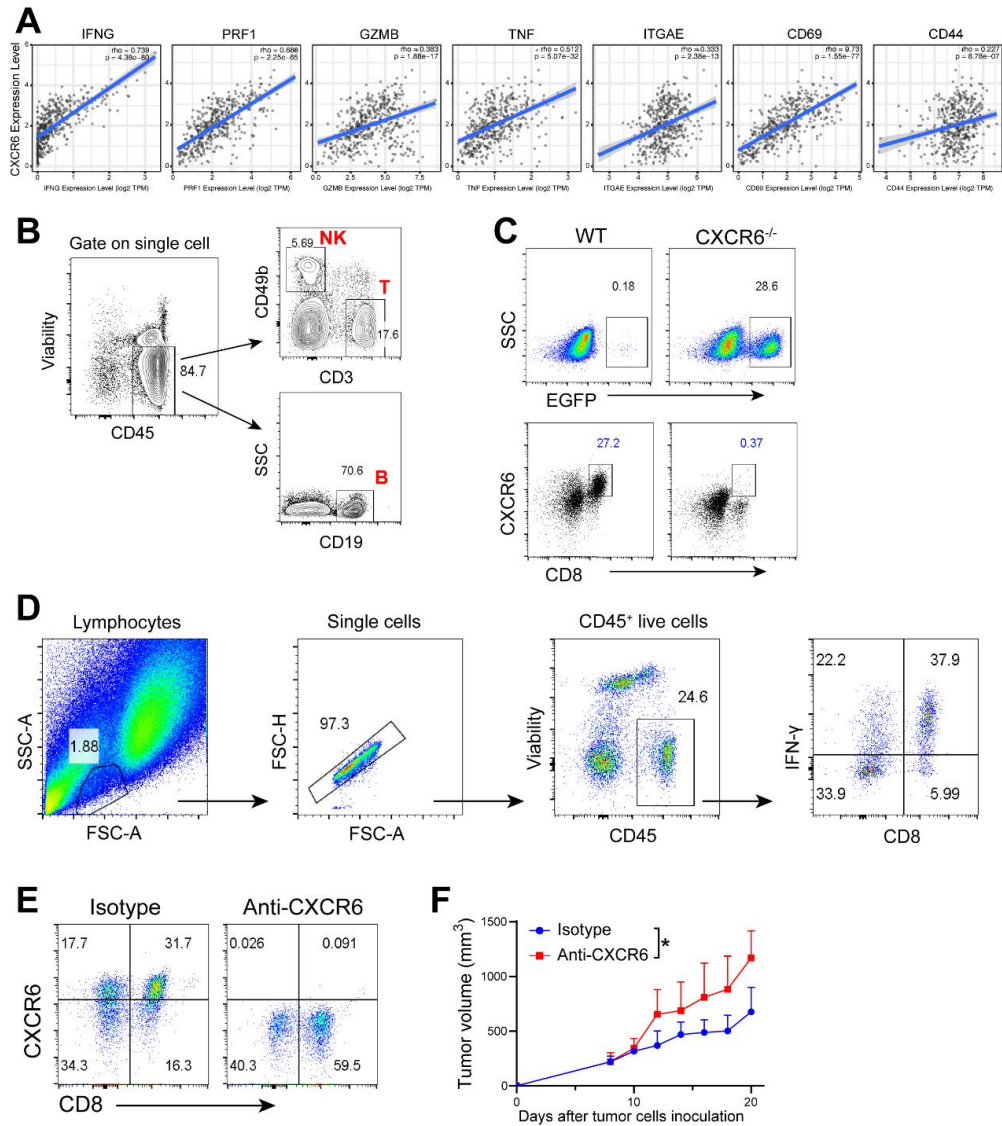

**Figure S2. Chimeras with *Cxcr6* deficiency on CD8<sup>+</sup> T cell are reconstituted successfully.**

**A.** Scatterplots showing correlation between CXCR6 and IFNG, PRF1, GZMB, TNF, ITGAE, CD69, CD44 expression in COAD in TCGA database determined by Tumor Immune Estimation Resource (TIMER, <http://cistrome.dfci.harvard.edu/TIMER/>) website. **B.** Dot plots showing the proportions of T, B and NK cells in chimeras. **C.** Identification of knockout mice with deletion of *Cxcr6*. **D.** Gating strategy for figure 2I. **E.** Identification of efficacy of anti-CXCR6. **F.** Tumor growth (n = 8). \**P* < 0.001.

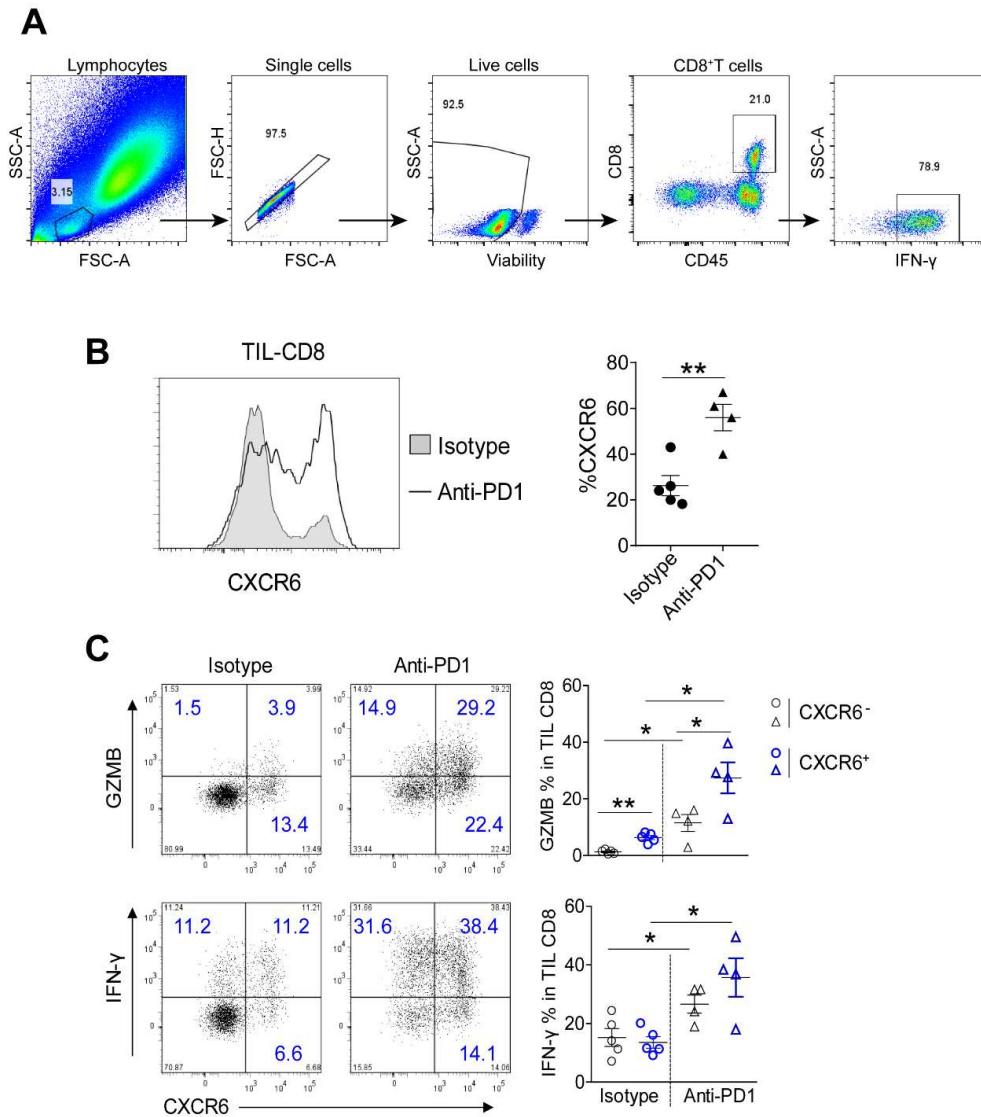

**Figure S3. CXCR6<sup>+</sup>CD8<sup>+</sup> T cells respond anti-PD-1 treatment more effectively in melanoma.**

**A.** Gating strategy for figure 3E. **B and C.** Proportions of tumor-infiltrating CD8<sup>+</sup> T cells (**B**) and effectors produced (**C**) was quantified from mice treated with isotype or anti-PD-1. Data are presented as the mean ± SEM. \* $P < 0.05$ , \*\* $P < 0.01$ . Statistical significance determined by two-way ANOVA with Tukey's multiple comparison test.

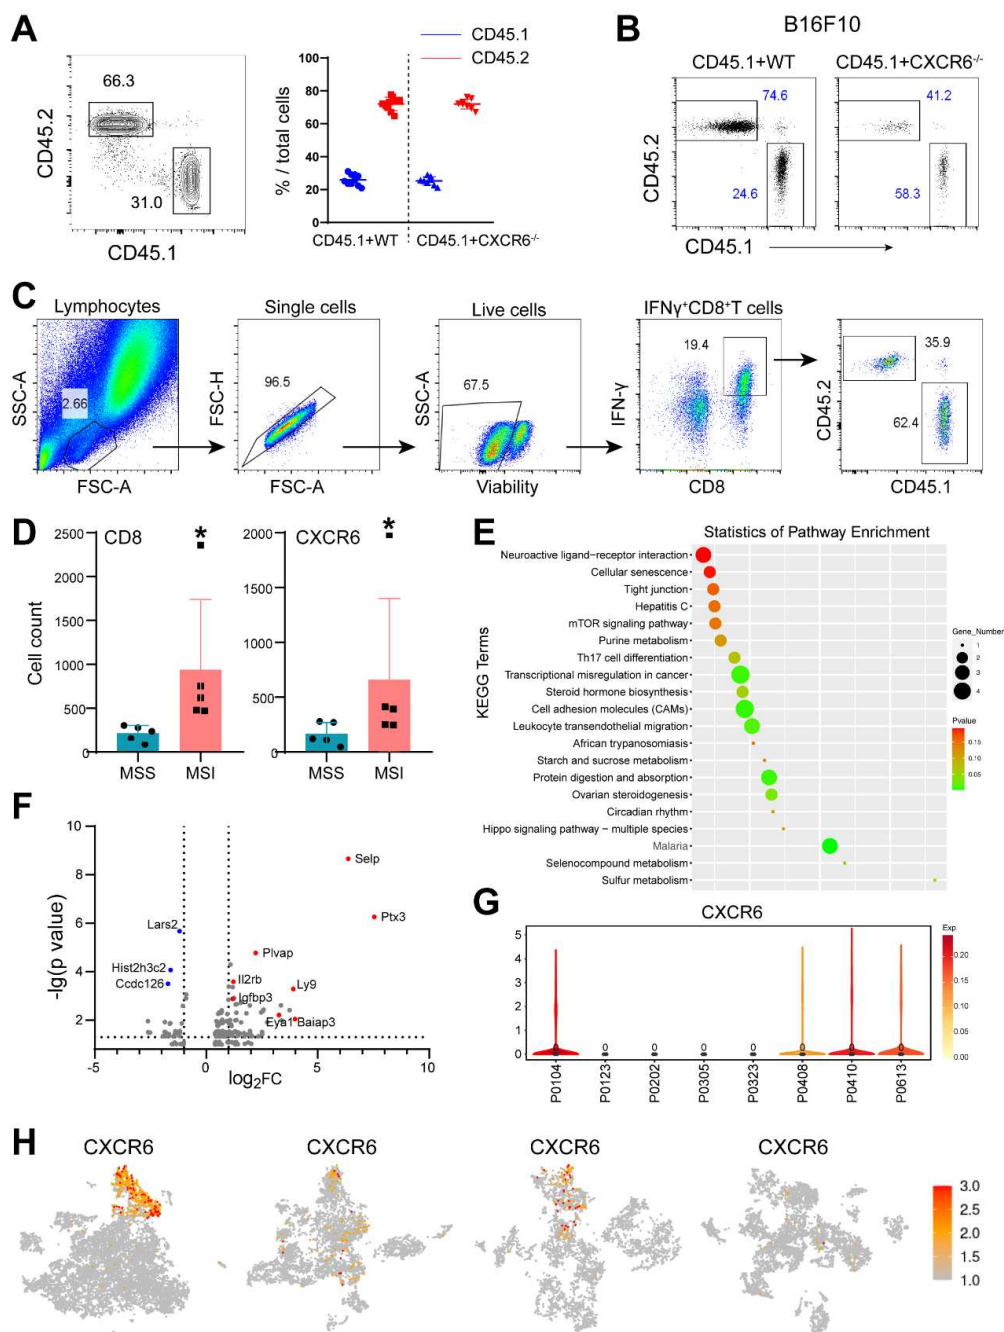

**Figure S4. Chimeras with CD45.1 and CD45.2 double positive are reconstituted successfully.**

**A.** Dot plots showing the proportions of CD45.1<sup>+</sup> and CD45.2<sup>+</sup> cells from PB in chimeras. **B.** Quantification of CD45.1<sup>+</sup> and CD45.2<sup>+</sup> cells from melanoma gated on CXCR6<sup>+</sup>CD8<sup>+</sup> cells in chimeras. **C.** Gating strategy for figure 4C. **D.** Statistics for figure 4D. **E.** KEGG enrichment of top 20 pathways. **F.** Volcanoplot of selected genes. **G.** Violin plot showing the expression of CXCR6 from colon cancer

patients reported previously (Zhang L, et al. Cell. 2020). **H.** t-SNE plots showing CXCR6 expression in for 4 colon cancer patients. Single cell RNA sequencing data was from our previous dataset (unpublished).

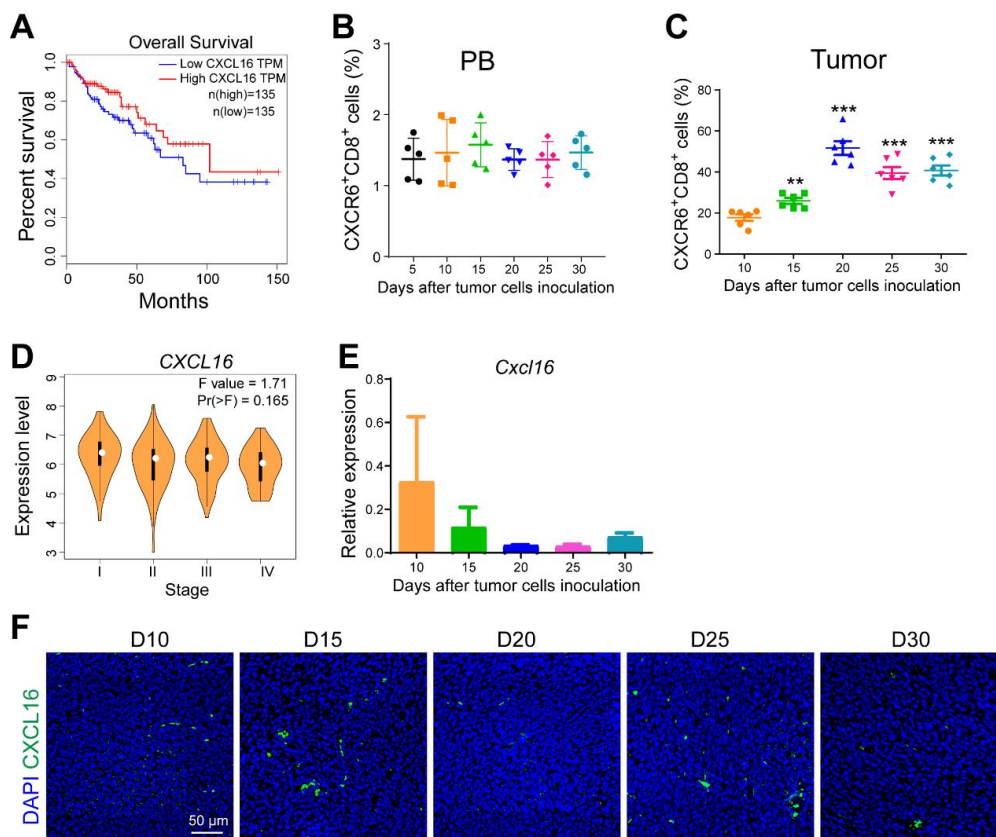

**Figure S5. The changes of CXCR6 and CXCL16 are not synchronous.**

**A.** Survival curve comparing the high and low expression of CXCR6 in COAD analyzed by GEPIA website. **B and C.** Timing course of proportions of CXCR6<sup>+</sup>CD8<sup>+</sup> T cells in PB (**B**) and tumor (**C**) from tumor burdened mice. **D.** The mRNA expression level of CXCL16 across tumor stages from patients in TCGA database. **E.** Relative gene expression of Cxcl16 on different days after tumor cells inoculation in murine MC38 xenograft model. **F.** Immunofluorescence staining showing DAPI (blue) / CXCL16 (green) in tumor tissues from murine MC38 xenograft model. Data are presented as the mean  $\pm$  SEM. \*\* $P < 0.01$ , \*\*\* $P < 0.001$ . Statistical significance determined by two-way ANOVA with Tukey's multiple comparison test.



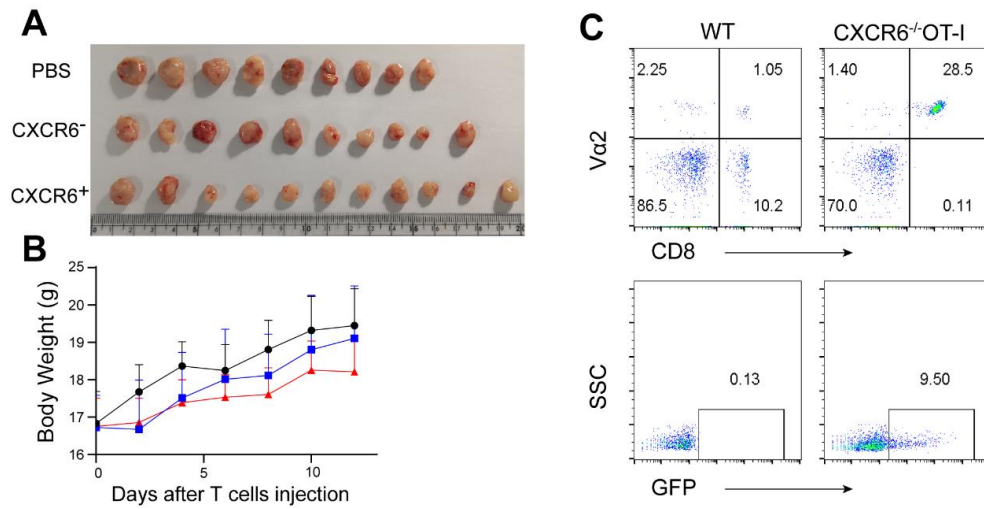

**Figure S6. CXCR6<sup>-/-</sup> OT-I mice are constructed successfully.**

**A.** Images of tumors. **B.** Body weight curves. **C.** Dot plots showing identification of the second generation of intercrossed mice including *Cxcr6*<sup>-/-</sup> and OT-I strains.
